# Supplementary material for: Induction and Processing of the Radiation-Induced Gamma-H2AX Signal and Its Link to the Underlying Pattern of DSB: A Combined Experimental and Modelling Study
Source: PLoS One. 2015 Jun 11;10(6):e0129416. doi: 10.1371/journal.pone.0129416 (PMC4465900; doi:10.1371/journal.pone.0129416)
Supplement: S1 Table — Fit parameters resulting from the application of the γH2AX kinetic model to the experimental data shown in S3 Fig. (DOC) [file pone.0129416.s005.doc]

| **D (Gy)** | **xfluor** |
| --- | --- |
| 2 | 0.046 ± 0.006 |
| 8 | 0.057 ± 0.004 |
| 25 | 0.059 ± 0.004 |
| 50 | 0.046 ± 0.002 |
| 250 | 0.022 ± 0.0006 |
| 500 | 0.021 ± 0.0003 |
|  | 0.24 ± 0.04 h |
| fast | 1.47 ± 0.09 h |
| slow | 10.29 ± 0.01 h |

Table S1
